# Supplementary material
Source: publisher figshare collection journal article supplement (https://tandf.figshare.com/articles/dataset/_/25103669)
Supplement: Supplementary file 1 [file 1]

**Supplemental material 2:** Booklet provided to the clinician examiners and the standardized patients. The CARE measure was reproduced 25 times.

|                                                                                                                         |
|-------------------------------------------------------------------------------------------------------------------------|
| <b>ETUDE CAR'ECOS</b><br><b>Évaluation de l'empathie des étudiants en médecine par la grille CARE au cours des ECOS</b> |
|-------------------------------------------------------------------------------------------------------------------------|

|                         |                                                       |                                                           |                                                               |
|-------------------------|-------------------------------------------------------|-----------------------------------------------------------|---------------------------------------------------------------|
| <b>Vous allez être*</b> | <b>Enseignant évaluateur</b> <input type="checkbox"/> | <b>Patient simulé enseignant</b> <input type="checkbox"/> | <b>Patient simulé société civile</b> <input type="checkbox"/> |
|-------------------------|-------------------------------------------------------|-----------------------------------------------------------|---------------------------------------------------------------|

\* vous ne pourrez pas changer de rôle au cours de la matinée

|                  |                                           |                                          |
|------------------|-------------------------------------------|------------------------------------------|
| <b>Vous êtes</b> | <b>Une femme</b> <input type="checkbox"/> | <b>Un homme</b> <input type="checkbox"/> |
|------------------|-------------------------------------------|------------------------------------------|

|                      |           |
|----------------------|-----------|
| <b>Votre âge est</b> | ..... ans |
|----------------------|-----------|

|                                                                          |                                                          |                                     |                                        |                                       |
|--------------------------------------------------------------------------|----------------------------------------------------------|-------------------------------------|----------------------------------------|---------------------------------------|
| <b>Si vous êtes enseignant quel est votre statut et votre spécialité</b> | <b>CCA</b> <input type="checkbox"/>                      | <b>PHU</b> <input type="checkbox"/> | <b>MCU-PH</b> <input type="checkbox"/> | <b>PU-PH</b> <input type="checkbox"/> |
|                                                                          | <b>Statut non universitaire</b> <input type="checkbox"/> |                                     |                                        |                                       |
|                                                                          | <b>Votre spécialité ?</b><br>.....                       |                                     |                                        |                                       |

**Rappel des consignes :**

- vous devez remplir une grille CARE **pour chaque étudiant** de votre station **en renseignant leur numéro de badge en haut de la feuille.**
- ne pas **changer de rôle au cours de la station**
- n'oublier pas de **donner votre avis sur la dernière page.**

**A la fin de l'ECOS (prévue à 13 :30)** laisser les documents sur la table nous les récupérerons.

**Veillez cocher une case pour chaque question et remplir chaque question.**

[illegible]
